# Supplementary material for: Impact of histologic subtypes and treatment modality among patients with primary central nervous system lymphoma: a SEER database analysis
Source: PubMed Central journal article supplement (PMC6034756; doi:10.18632/oncotarget.25622), 2018-06-22
Supplement: oncotarget-09-28897-s001.pdf [file oncotarget-09-28897-s001.pdf]

## Impact of histologic subtypes and treatment modality among patients with primary central nervous system lymphoma: a SEER database analysis

### SUPPLEMENTARY MATERIALS

Supplementary Table 1: Logrank test between each subtype

|       | HL | DLBCL | FL     | SLL   | BL    | MZL    | PTCL   |
|-------|----|-------|--------|-------|-------|--------|--------|
| HL    |    | 0.243 | 0.120  | 0.882 | 0.947 | 0.002  | 0.331  |
| DLBCL |    |       | <0.001 | 0.109 | 0.153 | <0.001 | 0.800  |
| FL    |    |       |        | 0.072 | 0.027 | 0.020  | <0.001 |
| SLL   |    |       |        |       | 0.822 | 0.001  | 0.135  |
| BL    |    |       |        |       |       | <0.001 | 0.231  |
| MZL   |    |       |        |       |       |        | <0.001 |
| PTCL  |    |       |        |       |       |        |        |
